# Supplementary material for: Near-infrared polyfluorene encapsulated in poly(ε-caprolactone) nanoparticles with remarkable large Stokes shift
Source: Royal Society of Chemistry journal article supplement (doi:10.1039/d0ra05809b), 2020-01-01
Supplement: d0ra05809b1.pdf [file d0ra05809b1.pdf]

## Supporting information

### Near-infrared Polyfluorene Encapsulated in Poly( $\epsilon$ -caprolactone) Nanoparticles with Remarkable Large Stokes Shift

Jaruwan Joothamongkon,<sup>a</sup> Udom Asawapirom,<sup>a</sup> Raweewan Thiramanas,<sup>a</sup> Kulachart Jangpatarapongsa,<sup>b</sup>  
and Duangporn Polpanich<sup>\*a</sup>

---

<sup>a</sup>NANOTEC, National Science and Technology Development Agency (NSTDA)

111 Thailand Science Park, Phahonyothin Road, Khlong Nueng, Khlong Luang, Pathum Thani 12120,  
Thailand

<sup>b</sup>Center for Innovation Development and Technology Transfer, Faculty of Medical Technology,  
Mahidol University, Bangkok-Noi, Bangkok 10700, Thailand

\*Corresponding author. E-mail: [duangporn@nanotec.or.th](mailto:duangporn@nanotec.or.th); Tel.: +66-2-117-6700 Fax: +66-2-564 6985

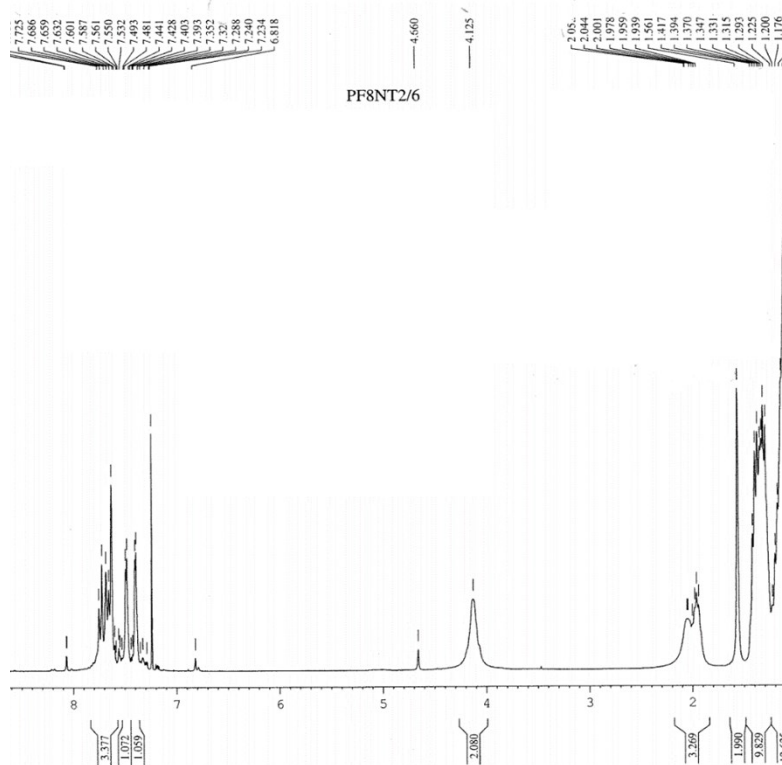

**Fig. S1**  $^1\text{H}$  NMR spectrum of PF8NT2/6.

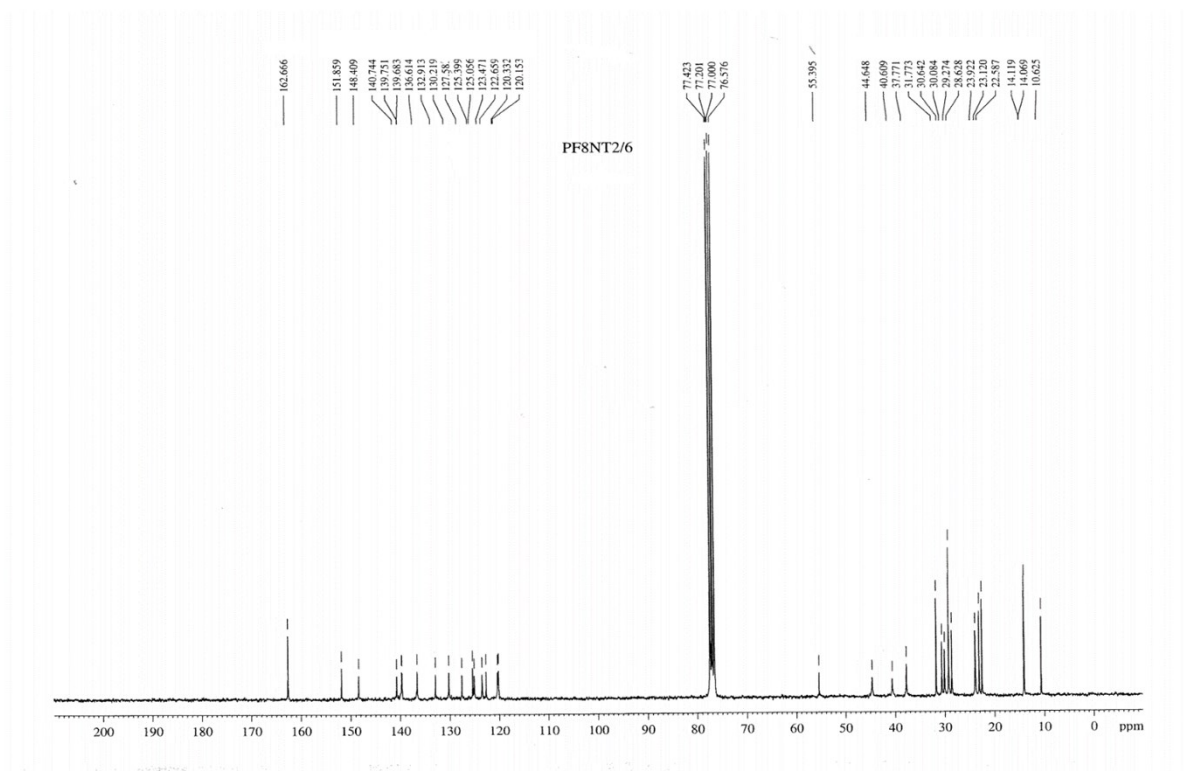

**Fig S2**  $^{13}\text{C}$  NMR spectrum of PF8NT2/6.

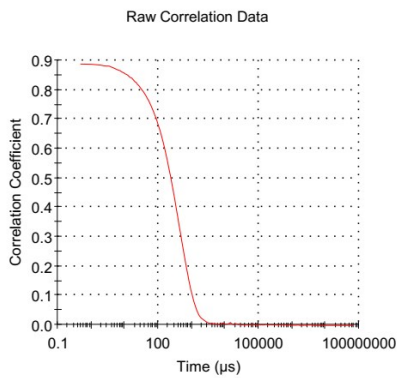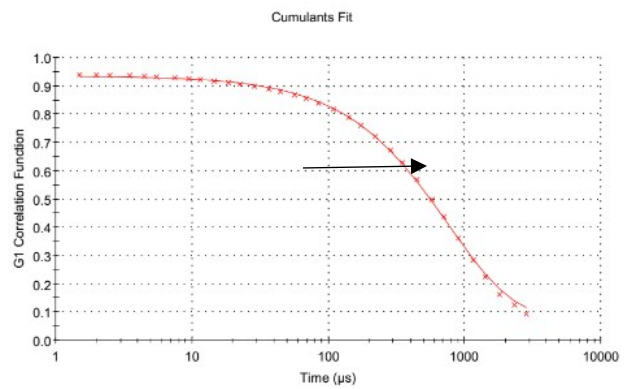

Fit a single exponential

$$G(\tau) = A [1 + B \exp(-2\Gamma\tau)]$$

$$G(\tau) = A [1 + B \exp(-2\Gamma\tau)]$$

A = the baseline of the correlation function  
 B = intercept of the correlation function  
 $\Gamma = Dq^2$   
 where D = translational diffusion coefficient  
 $q = (4\pi n / \lambda_0) \sin(\theta/2)$   
 where n = refractive index of dispersant,  
 $\lambda_0$  = wavelength of the laser,  
 $\theta$  = scattering angle.

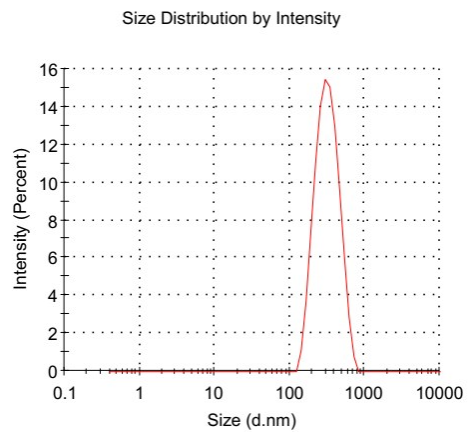

**Fig. S3** Autocorrelation function obtained from dynamic light scattering (DLS) for the PCL-PF8NT2/6-3 nanoparticles.

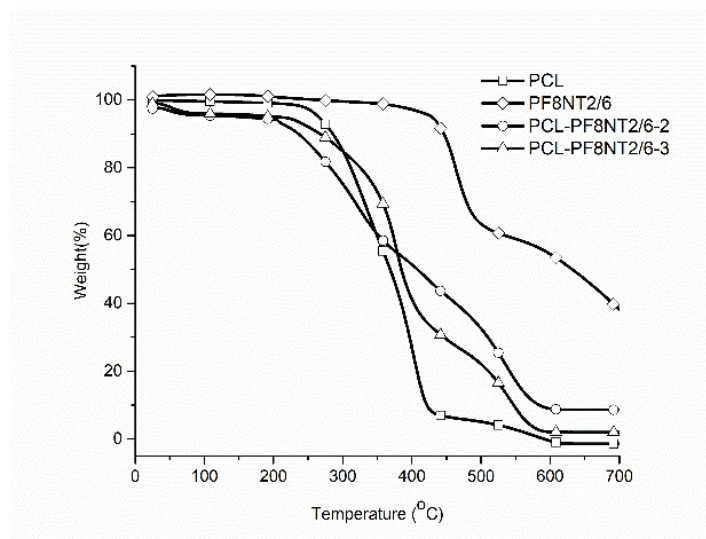

**Fig. S4** TGA of PCL-PF8NT2/6-2 and PCL-PF8NT2/6-3 nanoparticles compared to neat PCL and PF8NT2/6.

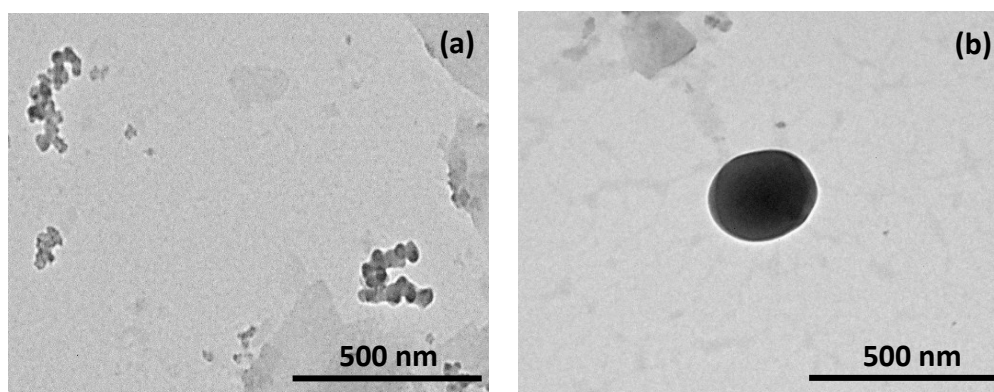

**Fig. S5** TEM micrographs of (a) PCL-PF8NT2/6-1 and (b) PCL-PF8NT2/6-2 nanoparticles.

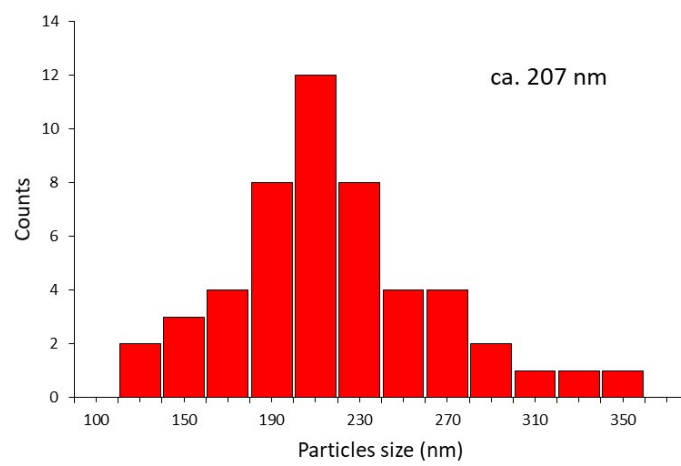

**Fig. S6** Particle size distribution of PCL-PF8NT2/6-3 nanoparticles determined from TEM images.

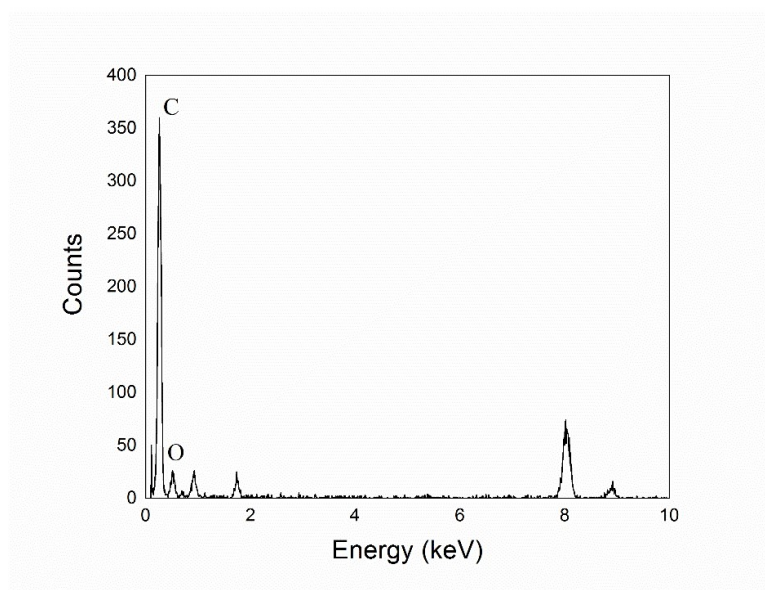

**Fig. S7** EDS spectrum of PCL nanoparticles.



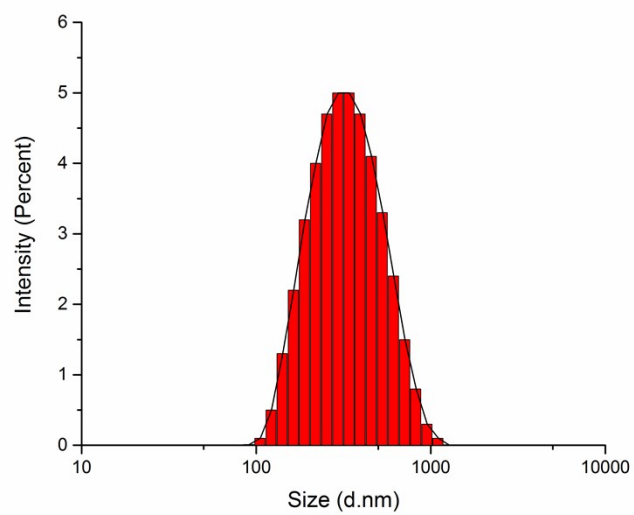

**Fig. S8** Histogram of PCL-PF8NT2/6-3 (at 1.5 mg of dye) in an aqueous phase and RPMI cell culture media.
